# Supplementary material
Source: MDPI journal article supplement (https://www.mdpi.com/1999-4907/5/11/2865)
Supplement: s1 [file s1]

Supplementary
